# Supplementary material for: Non-noble metal coordinated hypercrosslinked polymers based on porphyrin for efficient electrocatalytic OER
Source: Royal Society of Chemistry journal article supplement (doi:10.1039/d4nj01234h), 2024-01-01
Supplement: d4nj01234h1.pdf [file d4nj01234h1.pdf]

## Supplementary Information

### **Non-noble metal coordinated hypercrosslinked polymers based on porphyrin for efficient electrocatalytic OER**

Xinming Hu, Penglei Cui\*, Hong Zhang, Zitong He

*College of Science, Hebei Agricultural University, Baoding 071001, PR China*

#### Table of contents:

|                                                                                                              |   |
|--------------------------------------------------------------------------------------------------------------|---|
| FIGURE S1: <sup>1</sup> H NMR of the synthesized TPP.....                                                    | 1 |
| FIGURE S2: <sup>13</sup> C NMR of the synthesized TPP.....                                                   | 1 |
| FIGURE S3:XRD pattern of FX-TPP, FX-FeCo-TPP, FX-FeNi-TPP.....                                               | 2 |
| FIGURE S4:IR Spectrum (KBr) of TPP and FX-FeCo-TPP.....                                                      | 2 |
| FIGURE S5:Nitrogen adsorption and desorption curve and pore size distribution of FX-TPP and FX-FeCo-TPP..... | 2 |
| FIGURE S6: Comparison of N 1s in XPS between FX-TPP and FX-FeCo-TPP.....                                     | 2 |
| FIGURE S7:Cyclic voltammetry (CV) of FX-M-TPP at different scan rates.....                                   | 3 |
| Table S1:The comparison of the electrocatalytic OER of different catalytic systems..                         | 3 |
| References.....                                                                                              | 4 |

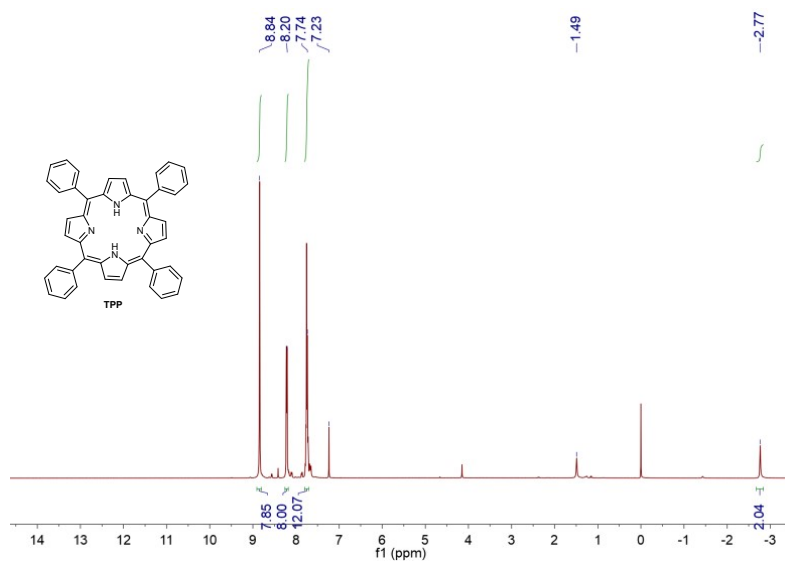

**Fig. S1**  $^1\text{H}$  NMR of the synthesized TPP

$^1\text{H}$  NMR spectrum (CDCl<sub>3</sub>, 400 MHz)  $\delta$ : 8.84 (s, 8H, ArH), 8.21-8.20 (d,  $J$  = 4.0 Hz, 8H, Pyrrole-H), 7.77-7.72 (m, 12H, ArH), and -2.77 (s, 2H, N-H).

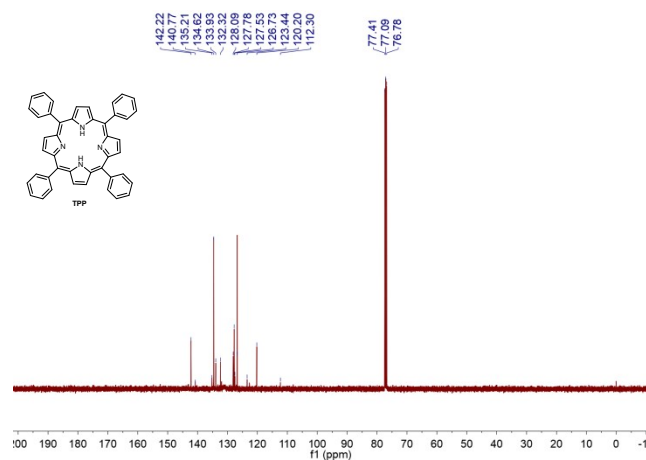

**Fig. S2**  $^{13}\text{C}$  NMR of the synthesized TPP

$^{13}\text{C}$  NMR spectrum (CDCl<sub>3</sub>, 101 MHz)  $\delta$ : 142.22, 140.47, 135.21, 134.62, 133.93, 132.32, 128.09, 128.78, 127.53, 126.73, 123.44, 120.20, 112.30.

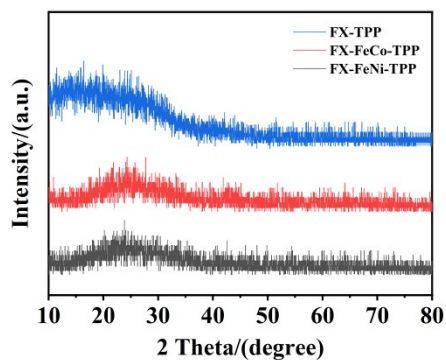

Fig. S3 XRD pattern of FX-TPP, FX-FeCo-TPP, FX-FeNi-TPP

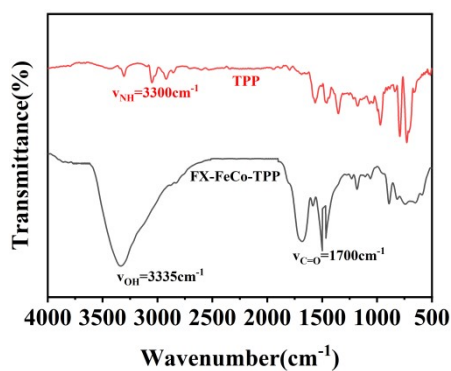

Fig. S4 FT-IR of TPP and FX-FeCo-TPP

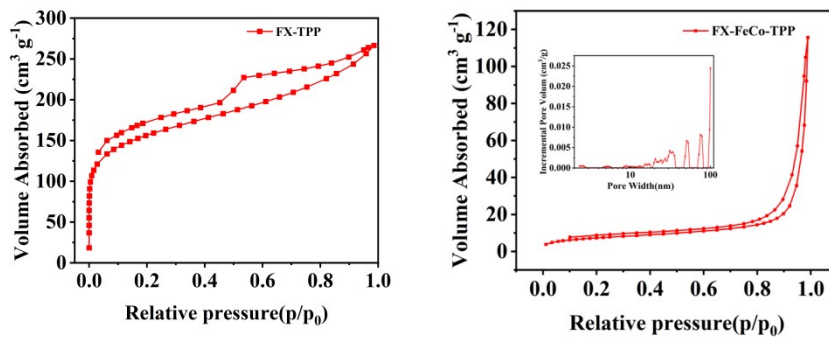

Fig. S5 Nitrogen adsorption and desorption curve and pore size distribution of FX-TPP (a) and FX-FeCo-TPP (b)

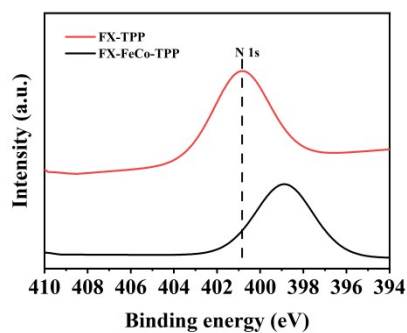

Fig. S6 Comparison of N 1s in XPS between FX-TPP and FX-FeCo-TPP

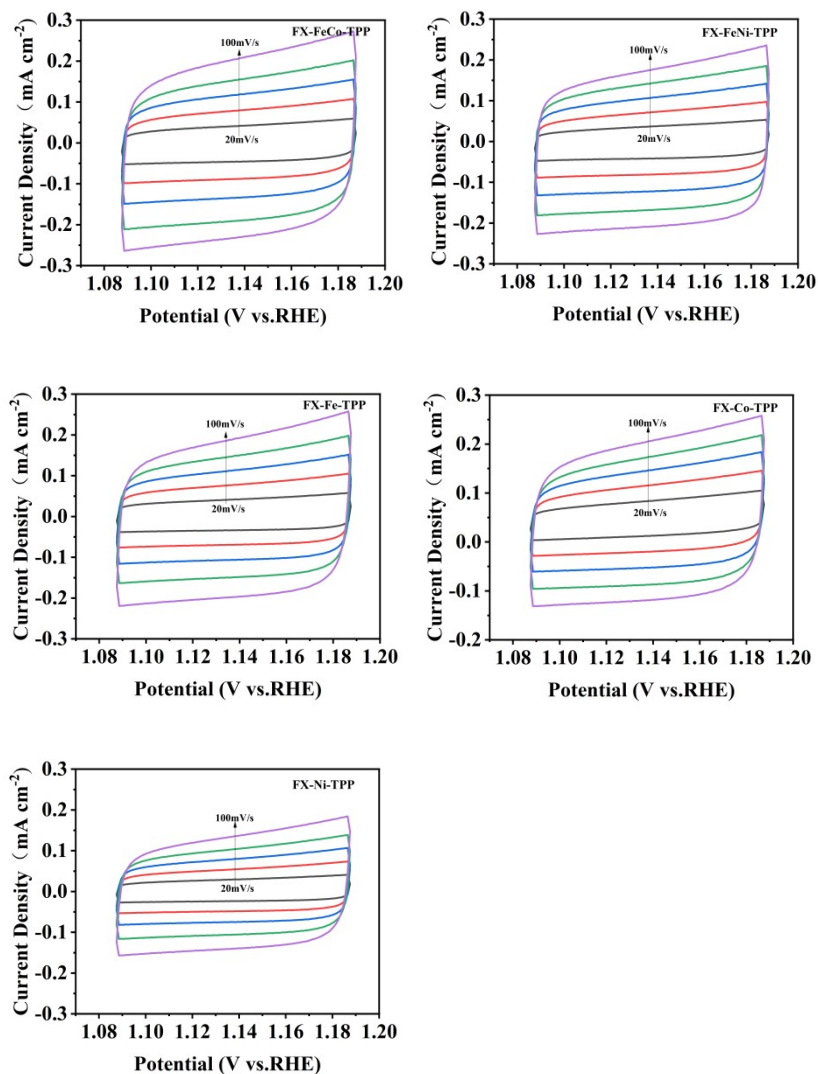

Fig. S7 Cyclic voltammetry (CV) of FX-M-TPP at different scan rates.

**Table S1** The comparison of the electrocatalytic OER of different catalytic systems

| Sample                         | Electrolyte<br>(KOH) | Electrode | Overpotentia<br> <br>(mV) | Tafel slope<br>(mV dec <sup>-1</sup> ) | Ref. |
|--------------------------------|----------------------|-----------|---------------------------|----------------------------------------|------|
| IISERP-COF-3_Ni <sub>3</sub> N | 1.0M                 | GCE       | 230                       | 79                                     | [1]  |
| FeMOFs-SO <sub>3</sub>         | 1.0M                 | NF        | 218                       | 36.2                                   | [2]  |
| macro-TpBpy-Co                 | 0.1M                 | RDE       | 380                       | 54                                     | [3]  |
| Ni/Fe-COF@CNT <sub>900</sub>   | 0.1M                 | RDE       | 320                       | 61                                     | [4]  |
| C4-SHz COF                     | 1.0M                 | GCE       | 320                       | 39                                     | [5]  |
| Fe <sub>2</sub> Ni MOF/NF      | 1.0M                 | NF        | 222                       | 42.39                                  | [6]  |

|                                                                  |      |     |     |      |           |
|------------------------------------------------------------------|------|-----|-----|------|-----------|
| NiPc–Ni                                                          | 1.0M | GCE | 319 | 83   | [7]       |
| S/N-CMF@Fe <sub>x</sub> Co <sub>y</sub> Ni <sub>1-x-y</sub> -MOF | 1.0M | GCE | 296 | 53.5 | [8]       |
| Ni-Fe-MOFs NSs                                                   | 1.0M | GCE | 221 | 56   | [9]       |
| CoZn MOF/CC                                                      | 1.0M | CC  | 287 | 76.3 | [10]      |
| FX-FeCo-TPP                                                      | 1.0M | NF  | 251 | 35.2 | This work |

## References

- 1 S. Nandi, S. K. Singh, D. Mullangi, R. Illathvalappil, *Adv. Energy Mater.*, 2016, **6**, 1601189.
- 2 K. Feng, D. Zhang, F. F. Liu, H. Li, *Adv. Energy Mater.*, 2020, **10**, 2000184.
- 3 X. J. Zhao, P. Pachfule, S. Li, T. Langenhahn, M. Y. Ye, C. Schlesiger, S. Praetz, J. Schmidt, A. Thomas, *J. Am. Chem. Soc.*, 2019, **16**, 6623-6630.
- 4 Q. Xu, J. Qian, D. Luo, G. J. Liu, Y. Guo, G. F. Zeng, *Adv. Sustain. Syst.*, 2020, **4**, 2000115.
- 5 S. Mondal, B. Mohanty, M. Nurhuda, A. Bhaumik, *ACS catal.*, 2020, **10**, 5623-5630.
- 6 X. T. Ling, F. Du, Y. T. Zhang, *RSC Adv.*, 2019, **57**, 32940-33562.
- 7 J. W. Li, P. Liu, J. X. Mao, J. Y. Yan, W. B. Song, *J. Mater. Chem. A.*, 2019, **21**, 1279-1870.
- 8 Y. F. Zhao, X. F. Lu, Z. P. Wu, Z. H. Pei, D. Y. Luan, *Adv. Mater.*, 2023, **35**, 2207888.
- 9 F. L. Li, P. T. Wang, X. Q. Huang, D. J. Young, H. F. Wang, J. P. Lang, *Angew. Chem. In. Ed.*, 2019, **58**, 7051-7056.
- 10 J. Wu, Z. J. Yu, Y. Y. Zhang, S. Q. Niu, J. Y. Zhao, S. W. Li, P. Xu, *Small*, 2021, **17**, 2105150.
